# Supplementary material for: COL6A1 promotes metastasis and predicts poor prognosis in patients with pancreatic cancer
Source: PubMed Central journal article supplement — Int J Oncol. 2019 Jun 14;55(2):391–404. doi: 10.3892/ijo.2019.4825 (PMC6615918; doi:10.3892/ijo.2019.4825), 2019-06-14
Supplement: Supplementary_Data.pdf [file Supplementary_Data.pdf]

Table SI. Forward and reverse primers of upregulated genes used for reverse transcription-quantitative polymerase chain reaction.

| Primer        | Primer sequence (5'-3') |                         |
|---------------|-------------------------|-------------------------|
|               | Forward                 | Reverse                 |
| <i>COL6A1</i> | TCAAGAGCCTGCAG-TGGATG   | TGGACACTTCTTGTCT-ATGCAG |
| <i>PTK7</i>   | GATGGAATGCCTCAACGGT     | CAAACACTACTCTTCCCCAGC   |
| <i>COL8A1</i> | ACCCAAGAAAGGCAAAGAAATA  | TTAATTCCAGGTATCCCATGAC  |
| <i>ANXA6</i>  | AGCATCTTCGGTTGGTGTT     | CGGATACACTTCACTACGGC    |
| <i>NID1</i>   | CAACCACCATCATTAGACAAGA  | GGATTCACCAAGTCAGTCTCAA  |
| <i>CDH5</i>   | CTACCAGCCCAAAGTGTGTGA   | CGTGTTATCGTGATTATCCGTG  |
| <i>SPOCK1</i> | TGCGAACAGAGTCATCAAGC    | ACAGGGCTCGTACTTATCCAG   |
| <i>PTPRM</i>  | ACAGACAAACTCAAGCCAGATT  | ATTGATGTAGTTGCTGCTCTCC  |
| <i>HLA-B</i>  | TGCTGTGATGTGTAGGAGGAAG  | AGGGGAGGCGTGAAGAAAT     |
| <i>CDH11</i>  | CATCGTCATTCTCCTGGGTT    | CCACCACATAGAGGAAAGGAAG  |

ANXA6, Annexin A6; CDH, cadherin; COL6A1, collagen type VI  $\alpha$ 1 chain; COL8A1, collagen type VIII  $\alpha$ 1 chain; NID1, nidogen 1; PTPRM, protein tyrosine phosphatase receptor type M; PTK7, protein tyrosine kinase 7; SPOCK1, osteonectin.

Table SII. Forward and reverse primers of downregulated genes used for reverse transcription-quantitative polymerase chain reaction.

| Primer        | Primer sequence (5'-3') |                        |
|---------------|-------------------------|------------------------|
|               | Forward                 | Reverse                |
| <i>LY6D</i>   | GCTCCCAGACGACATCAGA     | AGAGGCTCCACTGTGTTCG    |
| <i>KLK11</i>  | TGTAGGGGGAGAGACCAGGAT   | CAGGTGAACTATGTAGCGGGG  |
| <i>SYT8</i>   | GAGACCTGCTGCTTCCACAT    | ACCAGTGCTCCAGAACATGC   |
| <i>TRIM31</i> | ATTCAAAGACCAACTCCAGGC   | GGGCTGAAGAGTGGTGATTT   |
| <i>UPK3B</i>  | TATCGGGTGAAGTTCCTCCT    | CTTGGTGGAGAGTGATGGG    |
| <i>WNT10A</i> | GGGTGCTCCTGTTCTTCCTACT  | ACGCACACACACCTCCATCT   |
| <i>TNNI2</i>  | AAGGAGGACACAGAGAAGGAGC  | AGGACTCGGACTCAAACATCTT |
| <i>MYH14</i>  | CGGCTGTTTACCAAGGTGAAG   | CACACAGTTCTGCCTCTGCTC  |
| <i>SCD</i>    | CCCCTACGGCTCTTTCTGAT    | TAGCGTACTCCCCTTCTCTTTG |
| <i>CRIP1</i>  | ATGCCCAAGTGTCCTCAAGT    | CAGCGTCTTCCCACATTTCTC  |

CRIP1, cysteine rich protein 1; KLK11, kallikrein 11; LY6D, lymphocyte antigen 6 family member D; MYH14, myosin heavy chain 14; SCD, stearyl-CoA desaturase; SYT8, synaptotagmin 8; TNNI2, troponin I2, fast skeletal type; TRIM31, tripartite motif containing 31; UPK3B, uropkin-3b precursor; WNT10A, Wnt family member 10 A.

Table SIII.  $\beta$ -actin forward and reverse primer sequences used for reverse transcription-quantitative polymerase chain reaction.

| Primer                          | Primer sequence (5'-3') |                      |
|---------------------------------|-------------------------|----------------------|
| <i><math>\beta</math>-actin</i> | Forward                 | Reverse              |
|                                 | AGCGAGCATCCCCAAAGTT     | GGGCACGAAGGCTCATCATT |

Table SIV. Alleles of 21 locations in the BxPC- M8 cell line as confirmed by the China Center for Type Culture Collection.

| BxPC- M8 cell line |          |          |
|--------------------|----------|----------|
| Marker             | Allele 1 | Allele 2 |
| D19S433            | 13       | 16.2     |
| D5S818             | 11       | 11       |
| D21S11             | 29       | 29       |
| D18S51             | 12       | 12       |
| D6S1043            | 12       | 12       |
| AMEL               | X        | X        |
| D3S1358            | 14       | 16       |
| D13S317            | 11       | 11       |
| D7S820             | 10       | 13       |
| D16S539            | 9        | 11       |
| CSF1PO             | 13       | 13       |
| Penta D            | 14       | 14       |
| D2S441             | 12       | 14       |
| vWA                | 14       | 18       |
| D8S1179            | 13       | 13       |
| TPOX               | 8        | 8        |
| Penta E            | 12       | 14       |
| TH01               | 9        | 9        |
| D12S391            | 19.3     | 20       |
| D2S1338            | 17       | 19       |
| FGA                | 20       | 21       |
